# Supplementary material for: Tumor-Preferential Induction of Immune Responses and Epidermal Cell Death in Actinic Keratoses by Ingenol Mebutate
Source: PubMed Central journal article supplement (PMC5017628; doi:10.1371/journal.pone.0160096), 2016-09-09
Supplement: pone.0160096.s002.pdf [file pone.0160096.s002.pdf]

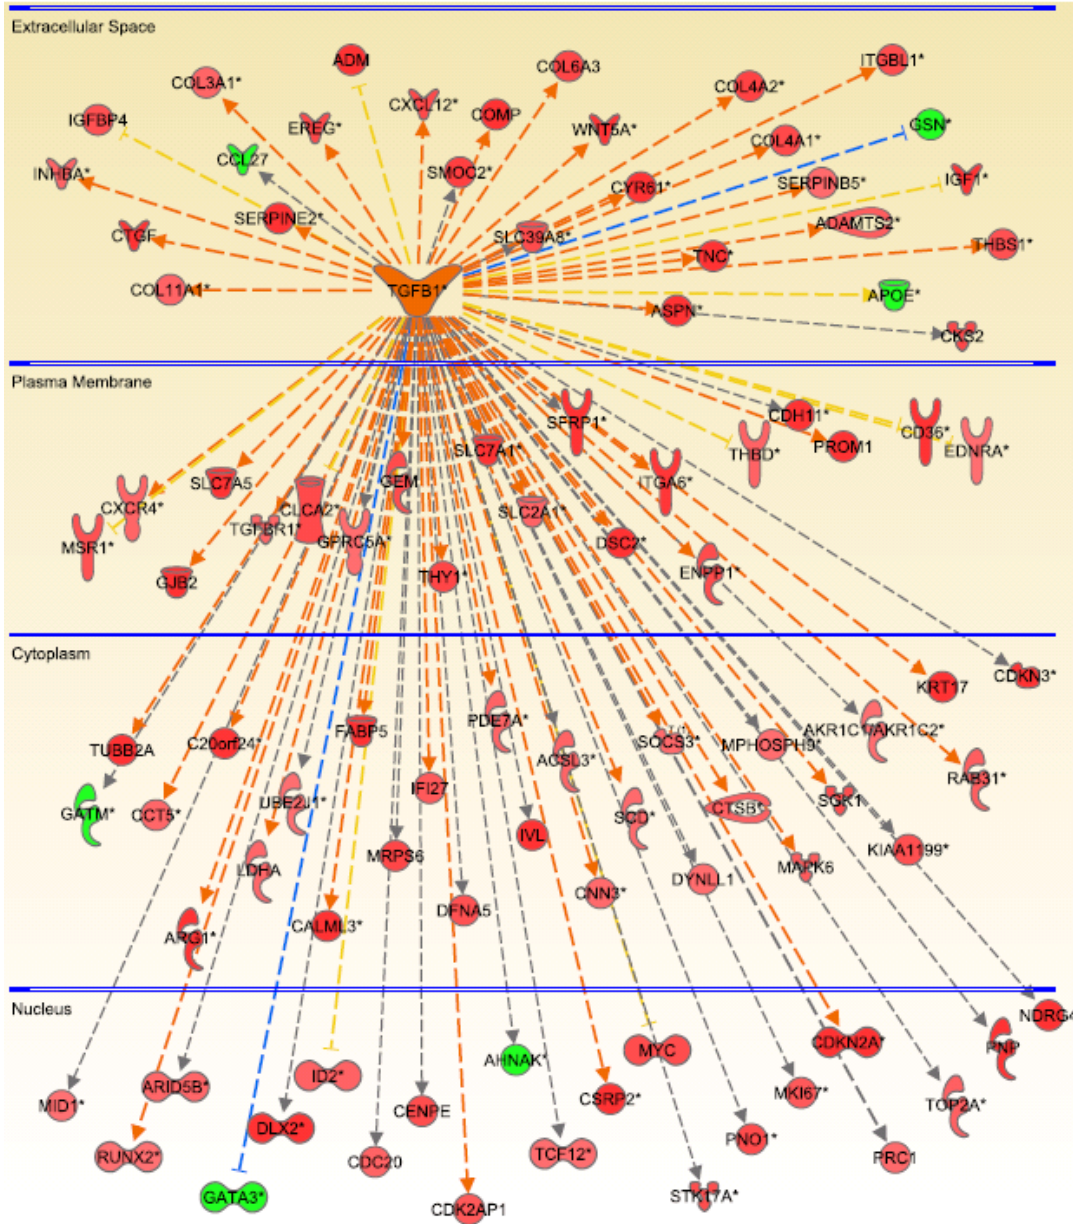

| Path Designer Shapes |                                   |
|----------------------|-----------------------------------|
|                      | Cytokine/Growth Factor            |
|                      | Drug                              |
|                      | Chemical/Toxicant                 |
|                      | Enzyme                            |
|                      | G-protein Coupled Receptor        |
|                      | Ion Channel                       |
|                      | Kinase                            |
|                      | Ligand-dependent Nuclear Receptor |
|                      | Peptidase                         |
|                      | Phosphatase                       |
|                      | Transcription Regulator           |
|                      | Translation Regulator             |
|                      | Transmembrane Receptor            |
|                      | Transporter                       |
|                      | Complex/Group/Other               |
