# Supplementary material for: Tumor-Preferential Induction of Immune Responses and Epidermal Cell Death in Actinic Keratoses by Ingenol Mebutate
Source: PubMed Central journal article supplement (PMC5017628; doi:10.1371/journal.pone.0160096), 2016-09-09

**A**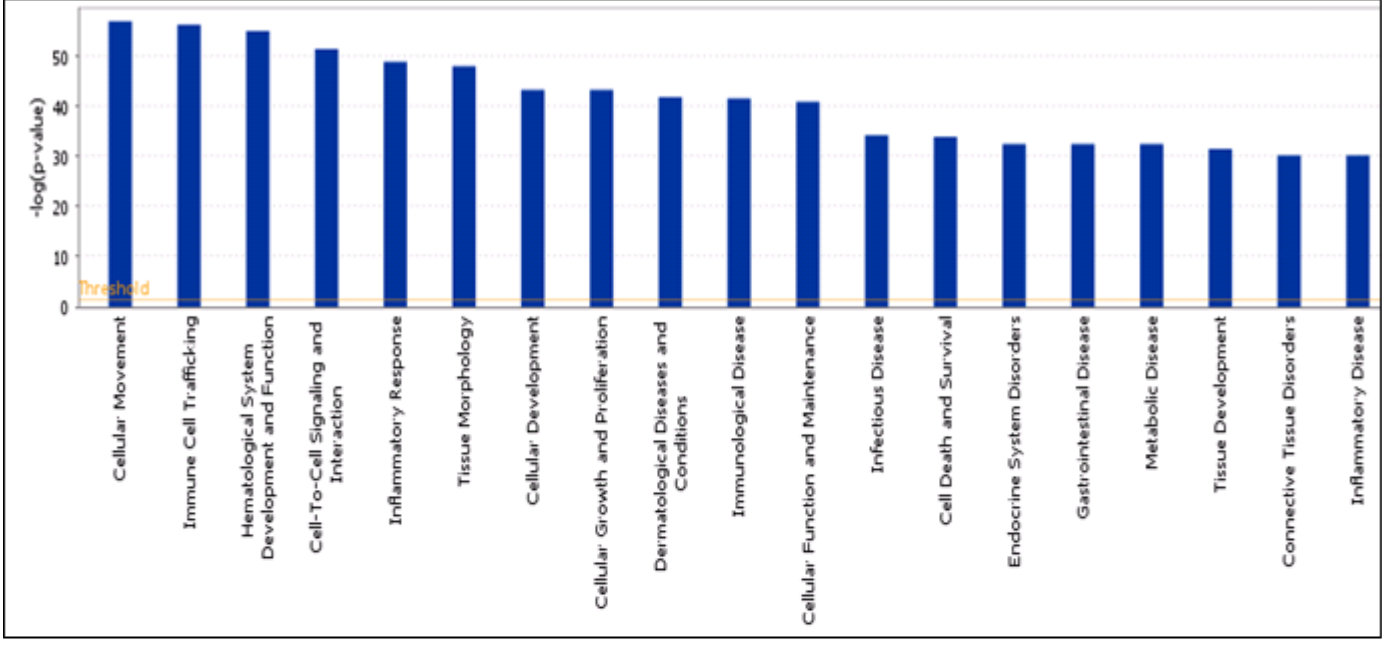**B**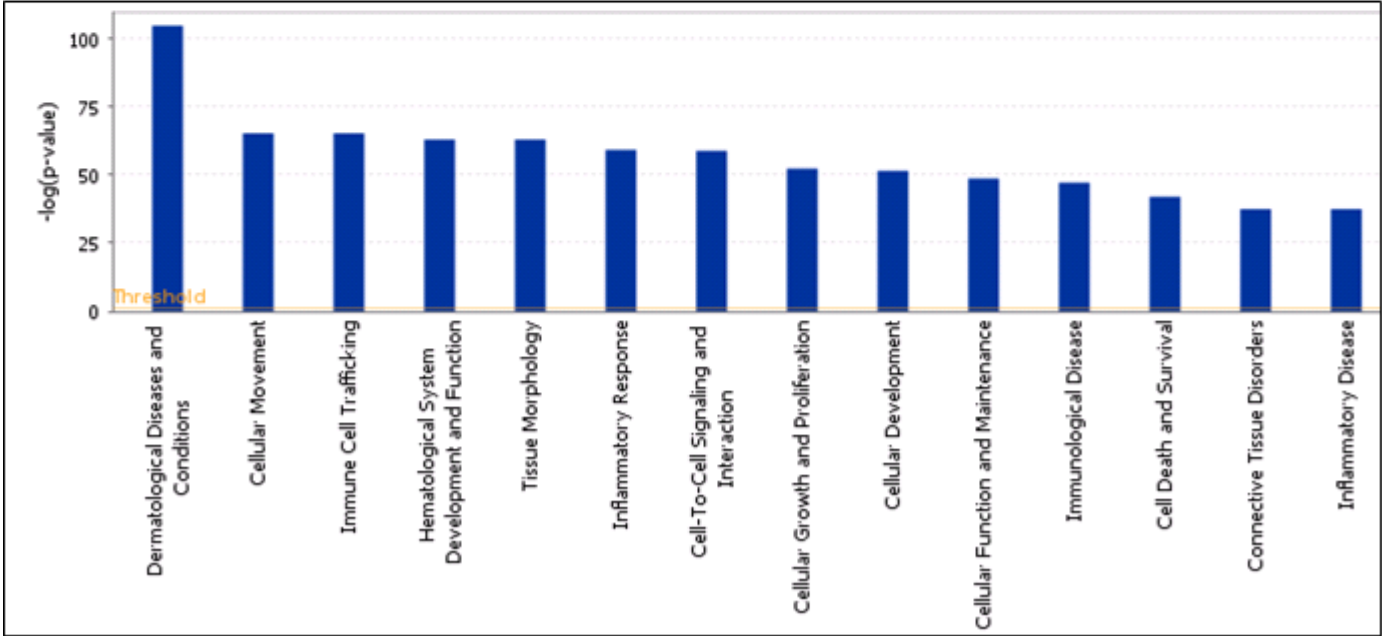

Supplement: pone.0160096.s003.pdf [file pone.0160096.s003.pdf]
