# Supplementary material for: Tumor-Preferential Induction of Immune Responses and Epidermal Cell Death in Actinic Keratoses by Ingenol Mebutate
Source: PubMed Central journal article supplement (PMC5017628; doi:10.1371/journal.pone.0160096), 2016-09-09
Supplement: pone.0160096.s007.pdf [file pone.0160096.s007.pdf]

| CD1A_EPIDERMIS |      |                |                        |                        |                        |         |
|----------------|------|----------------|------------------------|------------------------|------------------------|---------|
| Day            | Type | Analysis       | Fold Change difference | Lower Confidence Level | Upper Confidence Level | p-value |
| 0              |      | AK vs NS       | 1.53                   | 0.86                   | 2.72                   | 0.1382  |
| .              | AK   | Day 2 vs Day 0 | 0.66                   | 0.41                   | 1.06                   | 0.0844  |
| .              | NS   | Day 2 vs Day 0 | 1.37                   | 1.00                   | 1.88                   | 0.0470  |
| 2              |      | AK vs NS       | 0.67                   | 0.43                   | 1.05                   | 0.0805  |
| CD1A_DERMIS    |      |                |                        |                        |                        |         |
| Day            | Type | Analysis       | Fold Change Difference | Lower Confidence Level | Upper Confidence Level | p-value |
| 0              |      | AK vs NS       | 3.94                   | 1.87                   | 8.30                   | 0.0009  |
| .              | AK   | Day 2 vs Day 0 | 0.89                   | 0.49                   | 1.63                   | 0.7026  |
| .              | NS   | Day 2 vs Day 0 | 1.20                   | 0.72                   | 2.01                   | 0.4727  |
| 2              |      | AK vs NS       | 2.63                   | 1.59                   | 4.36                   | 0.0006  |
| CD20_DERMIS    |      |                |                        |                        |                        |         |
| Day            | Type | Analysis       | Fold Change Difference | Lower Confidence Level | Upper Confidence Level | p-value |
| 0              |      | AK vs NS       | 18.58                  | 4.10                   | 84.22                  | 0.0005  |
| .              | AK   | Day 2 vs Day 0 | 7.71                   | 1.90                   | 31.27                  | 0.0060  |
| .              | NS   | Day 2 vs Day 0 | 20.67                  | 7.16                   | 59.67                  | <.0001  |
| 2              |      | AK vs NS       | 5.43                   | 1.68                   | 17.62                  | 0.0067  |
| CD4_EPIDERMIS  |      |                |                        |                        |                        |         |
| Day            | Type | Analysis       | Fold Change difference | Lower Confidence Level | Upper Confidence Level | p-value |
| 0              |      | AK vs NS       | 5.12                   | 2.17                   | 12.04                  | 0.0006  |
| .              | AK   | Day 2 vs Day 0 | 6.91                   | 2.46                   | 19.42                  | 0.0007  |
| .              | NS   | Day 2 vs Day 0 | 28.23                  | 14.40                  | 55.35                  | <.0001  |
| 2              |      | AK vs NS       | 1.42                   | 0.60                   | 3.40                   | 0.4093  |
| CD4_DERMIS     |      |                |                        |                        |                        |         |
| Day            | Type | Analysis       | Fold Change Difference | Lower Confidence Level | Upper Confidence Level | p-value |
| 0              |      | AK vs NS       | 3.27                   | 1.77                   | 6.04                   | 0.0006  |
| .              | AK   | Day 2 vs Day 0 | 3.09                   | 1.71                   | 5.58                   | 0.0006  |
| .              | NS   | Day 2 vs Day 0 | 4.53                   | 2.84                   | 7.23                   | <.0001  |
| 2              |      | AK vs NS       | 2.37                   | 1.65                   | 3.41                   | <.0001  |
| 2              |      | AK vs NS       | 2.16                   | 1.31                   | 3.57                   | 0.0042  |

| CD8_DERMIS    |      |                |                        |                        |                        |         |
|---------------|------|----------------|------------------------|------------------------|------------------------|---------|
| Day           | Type | Analysis       | Fold Change difference | Lower Confidence Level | Upper Confidence Level | p-value |
| 0             |      | AK vs NS       | 4.27                   | 2.15                   | 8.45                   | 0.0002  |
| .             | AK   | Day 2 vs Day 0 | 2.77                   | 1.51                   | 5.05                   | 0.0019  |
| .             | NS   | Day 2 vs Day 0 | 4.15                   | 2.39                   | 7.21                   | <.0001  |
| 2             |      | AK vs NS       | 2.14                   | 1.26                   | 3.61                   | 0.0065  |
| ICAM1_NUMBER  |      |                |                        |                        |                        |         |
| Day           | Type | Analysis       | Fold Change difference | Lower Confidence Level | Upper Confidence Level | p-value |
| 0             |      | AK vs NS       | 3.05                   | 1.70                   | 5.47                   | 0.0006  |
| .             | AK   | Day 2 vs Day 0 | 1.48                   | 0.84                   | 2.60                   | 0.1646  |
| .             | NS   | Day 2 vs Day 0 | 2.20                   | 1.32                   | 3.66                   | 0.0037  |
| 2             |      | AK vs NS       | 2.04                   | 1.17                   | 3.54                   | 0.0139  |
| MPO EPIDERMIS |      |                |                        |                        |                        |         |
| Day           | Type | Analysis       | Fold Change Difference | Lower Confidence Level | Upper Confidence Level | p-value |
| 0             |      | AK vs NS       | 18.12                  | 4.07                   | 80.60                  | 0.0005  |
| .             | AK   | Day 2 vs Day 0 | 120.7                  | 22.17                  | 657.2                  | <.0001  |
| .             | NS   | Day 2 vs Day 0 | 4221                   | 1047                   | 17017                  | <.0001  |
| 2             |      | AK vs NS       | 0.67                   | 0.10                   | 4.44                   | 0.6608  |
| MPO DERMIS    |      |                |                        |                        |                        |         |
| Day           | Type | Analysis       | Fold Change Difference | Lower Confidence Level | Upper Confidence Level | p-value |
| 0             |      | AK vs NS       | 4.38                   | 1.84                   | 10.42                  | 0.0017  |
| .             | AK   | Day 2 vs Day 0 | 30.77                  | 11.17                  | 84.77                  | <.0001  |
| .             | NS   | Day 2 vs Day 0 | 118.8                  | 51.29                  | 275.3                  | <.0001  |
| 2             |      | AK vs NS       | 1.06                   | 0.33                   | 3.42                   | 0.9138  |
