# Supplementary material for: Tumor-Preferential Induction of Immune Responses and Epidermal Cell Death in Actinic Keratoses by Ingenol Mebutate
Source: PubMed Central journal article supplement (PMC5017628; doi:10.1371/journal.pone.0160096), 2016-09-09
Supplement: pone.0160096.s008.pdf [file pone.0160096.s008.pdf]

| Genes of interest | Group of genes     | AK0 compared to US0 | US2 compared to US0 | AK2 compared to AK0 |
|-------------------|--------------------|---------------------|---------------------|---------------------|
| CDSN              | Epidermis-specific |                     | ↓*                  | ↓*                  |
| DSC1              | Epidermis-specific |                     | ↓***                | ↓***                |
| FLG2              | Epidermis-specific | ↓**                 | ↓***                | ↓***                |
| KRT2              | Epidermis-specific |                     | ↓***                | ↓***                |
| KRT9              | Epidermis-specific | ↑***                | ↓*                  | ↓***                |
| TGM3              | Epidermis-specific |                     | ↑NS                 |                     |
| MMP1              | Fibroblast         | ↑NS                 | ↑***                | ↑***                |
| CCL18             | Chemokine          | ↑NS                 | ↑***                | ↑**                 |
| IL8               | Chemokine          | ↑NS                 | ↑***                | ↑***                |
| CD4               | Immune cell        |                     | ↑NS                 |                     |
| CD207             | Immune cell        | ↓*                  | ↓NS                 | ↓NS                 |
| CD34              | Adhesion proteins  | ↓*                  | ↓***                | ↓***                |
| ICAM1             | Adhesion proteins  |                     | ↑***                | ↑**                 |
| SELL              | Adhesion proteins  | ↑**                 | ↑***                | ↑***                |
