# Supplementary material for: Tumor-Preferential Induction of Immune Responses and Epidermal Cell Death in Actinic Keratoses by Ingenol Mebutate
Source: PubMed Central journal article supplement (PMC5017628; doi:10.1371/journal.pone.0160096), 2016-09-09
Supplement: pone.0160096.s009.pdf [file pone.0160096.s009.pdf]

| <b>Genes of interest</b> | <b>Group of Genes and Gene information</b>                                         | <b>AK0 compared to US0</b> | <b>US2 compared to US0</b> | <b>AK2 compared to AK0</b> |
|--------------------------|------------------------------------------------------------------------------------|----------------------------|----------------------------|----------------------------|
| miR-150                  | <i>Inflammation, innate immunity</i><br>[Zidar et al., 2010]                       | ↑ NS (0.3)                 | ↑*** (2.4)                 | ↑** (2.2)                  |
| miR-31                   | <i>Inflammation, negatively regulate FOXP3</i><br>[Divekar et al., 2011]           | ↑*** (7.2)                 | ↑*** (5.3)                 | NS (0.3)                   |
| miR-31*                  | -                                                                                  | ↑* (7.7)                   | ↑ NS (1.2)                 | ↑ NS (1.1)                 |
| miR-211                  | <i>SCC oncogene</i><br>[Chu et al., 2013]                                          | ↑** (1.4)                  | ↓** (-0.7)                 | ↓* (-0.9)                  |
| miR-21                   | <i>Chronic inflammation</i><br>[Zibert et al., 2010]                               | ↑** (1.1)                  | ↑* (1.6)                   | ↑* (0.7)                   |
| miR-142-3p               | <i>Chronic inflammation</i><br>[Makino et al., 2012]                               | ↓ NS (-0.7)                | ↑** (2.4)                  | ↑** (1.7)                  |
| miR-10a                  | <i>Reduced levels critical for Treg function</i><br>[Kelada et al., 2013]          | ↓** (-2.0)                 | ↓ NS (-0.4)                | ↓ NS (-0.2)                |
| miR-205                  | <i>Epidermal differentiation</i><br>[Nissan et al., 2011]                          | ↓ NS (-0.0)                | ↓*** (-0.6)                | ↓* (-0.5)                  |
| miR-203                  | <i>Epidermal differentiation</i><br>[Yi et al., 2008]                              | ↓ NS (-0.3)                | ↓* (-0.4)                  | ↓* (-0.5)                  |
| miR-193b                 | <i>Negatively regulate wound healing</i><br>[Noh et al., 2011; Dayem et al., 2003] | ↓** (-0.6)                 | ↓ NS (-0.2)                | ↓*** (-0.6)                |
| miR-200a                 | -                                                                                  | ↑ NS (0.3)                 | ↓ NS (-2.2)                | ↑ NS (0.0)                 |
